# Supplementary material for: Multi-dimensional micro-/nano-reactor spheres for sustainable water treatment
Source: Royal Society of Chemistry journal article supplement (doi:10.1039/c7cy00483d), 2017-01-01
Supplement: c7cy00483d1.pdf [file c7cy00483d1.pdf]

*Electronic Supplementary Information (ESI) for*

## **Multi-Dimensional Micro-/nano-reactor Spheres for Sustainable Water Treatment**

Jeremy Koon Keong Ang<sup>a</sup>, Jermyn Juay<sup>a</sup>, Yonghao Kok<sup>a</sup>, Hongwei Bai<sup>b</sup>, Darren D. Sun<sup>a\*</sup>

School of Civil and Environmental Engineering, Nanyang Technological University, Singapore 639798.

Nano Sun Pte Ltd, Innovation Centre, Block 2, Unit 241, 18 Nanyang Drive, Nanyang Technological University, Singapore 637723.

E-mail: [ddsun@ntu.edu.sg](mailto:ddsun@ntu.edu.sg)

### **FESEM images of HHHS**

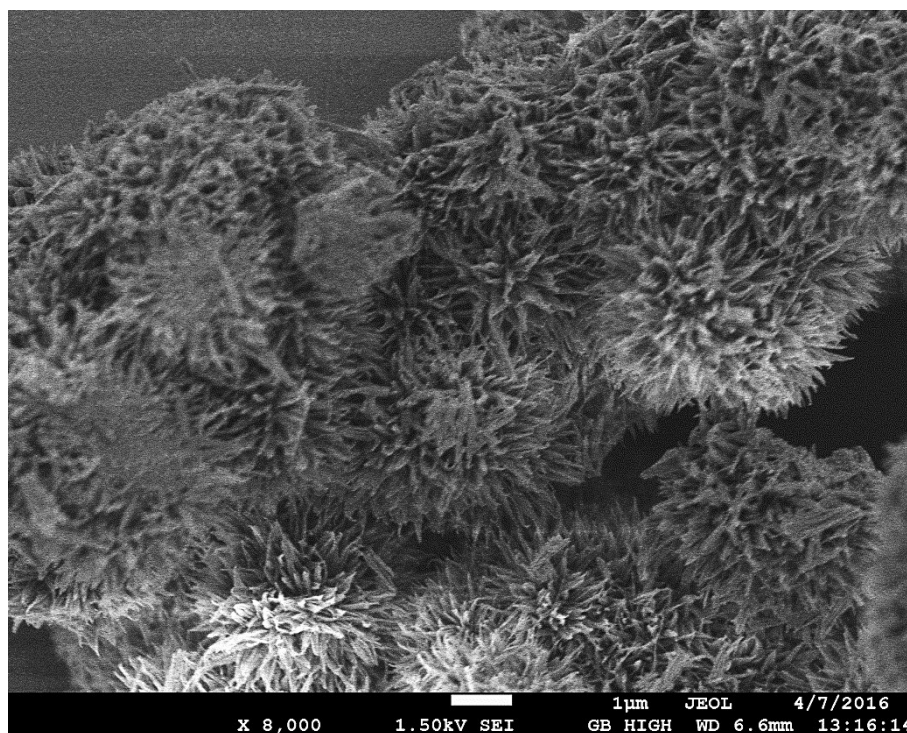

Figure 1 FESEM image of HHHS.

## TEM images of HHHS Multi-shell structure

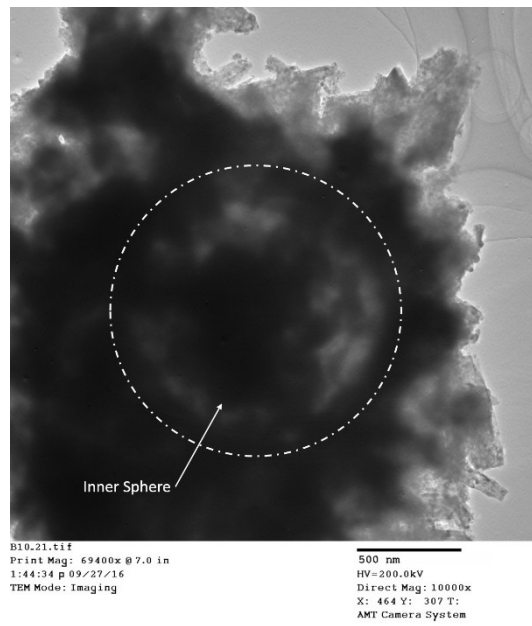

Figure 2 TEM image of inner sphere shown by the darker solid sphere within the round hollow shell

## EDX Analysis

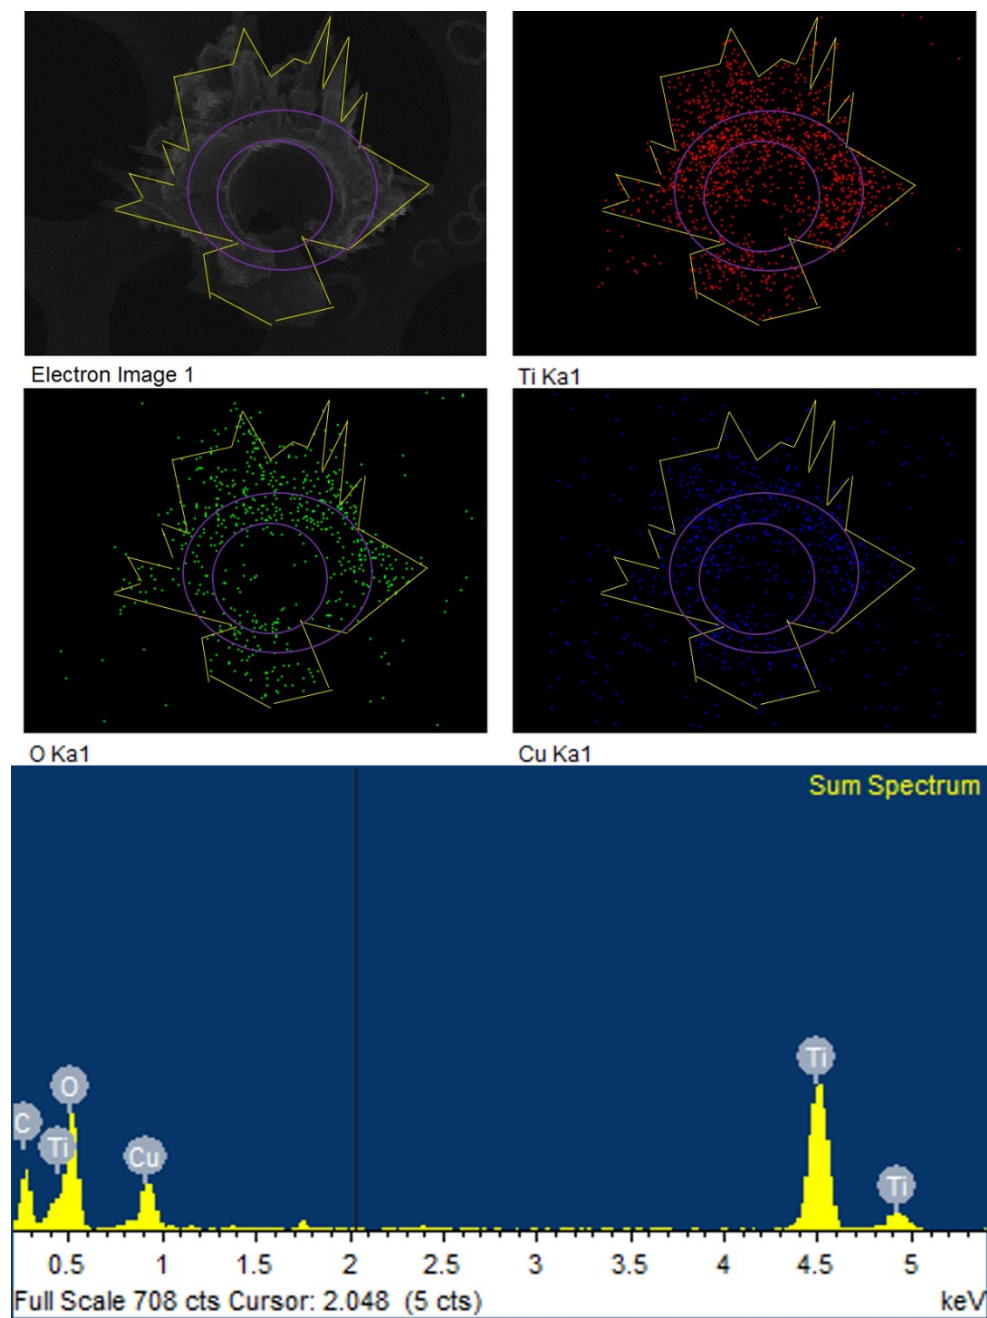

Figure 3 EDX analysis of HHHS

## XRD Analysis and Indexing Information

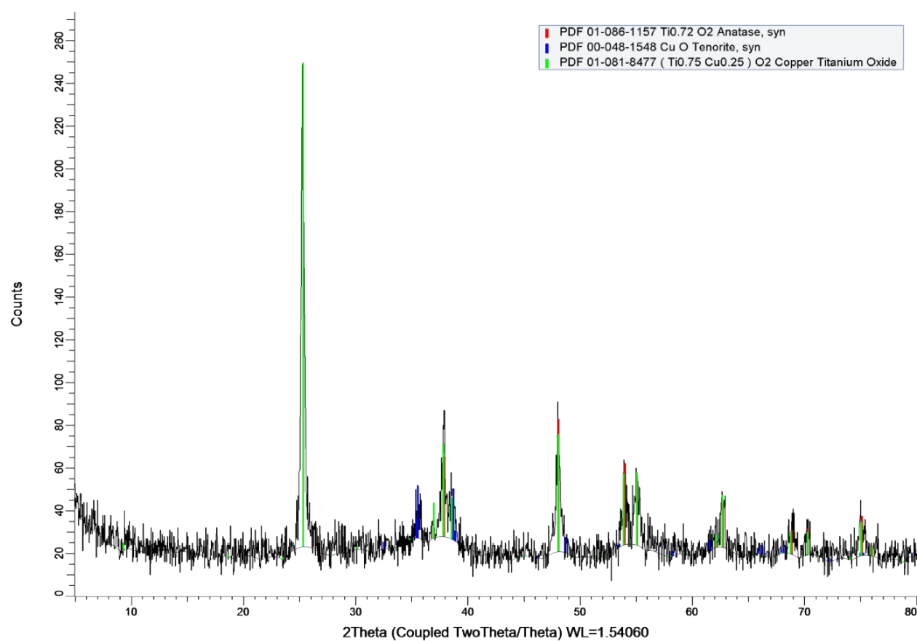

Figure 4. HHHS XRD indexing to Anatase TiO<sub>2</sub>, CuO & Copper Titanium Oxide

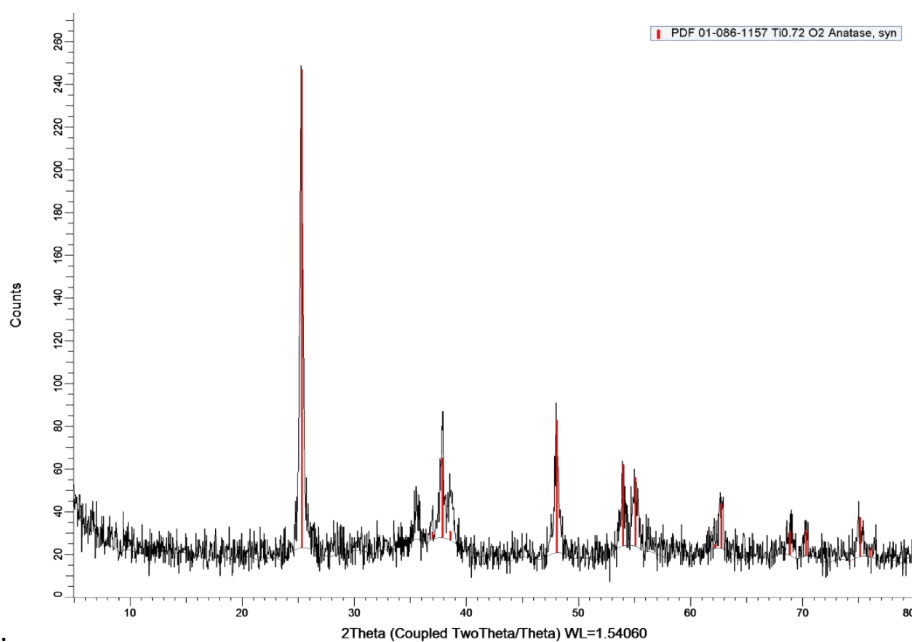

Figure 5. HHHS Individual XRD indexing to Anatase TiO<sub>2</sub>

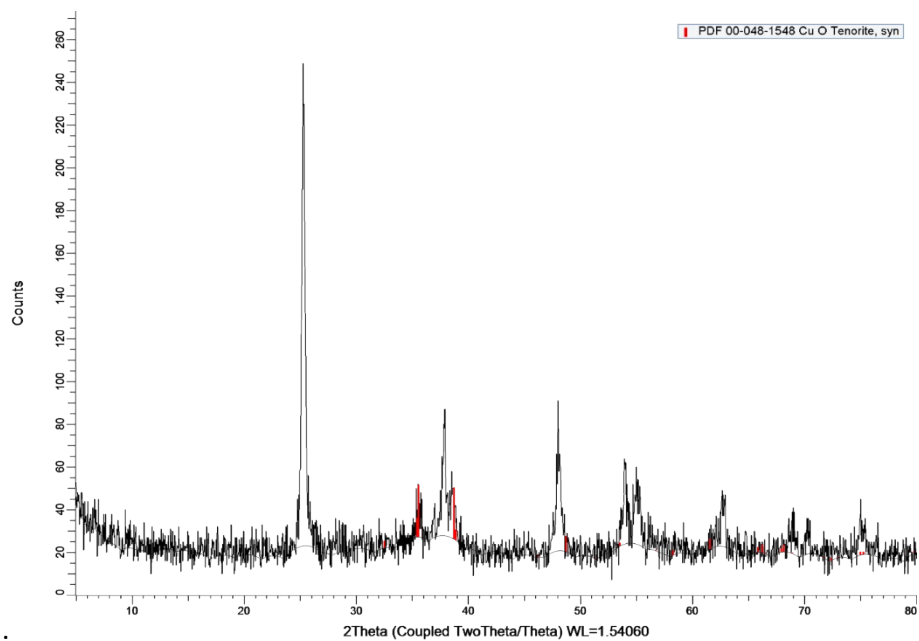

Figure 6. HHHS Individual XRD indexing to CuO

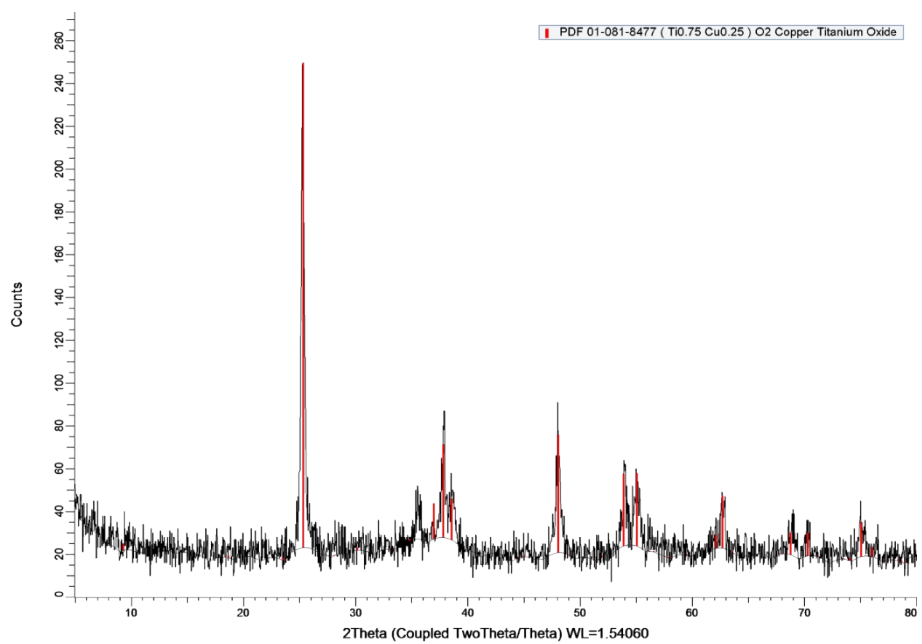

Figure 7. HHHS Individual XRD indexing to CuTi<sub>3</sub>O<sub>8</sub>

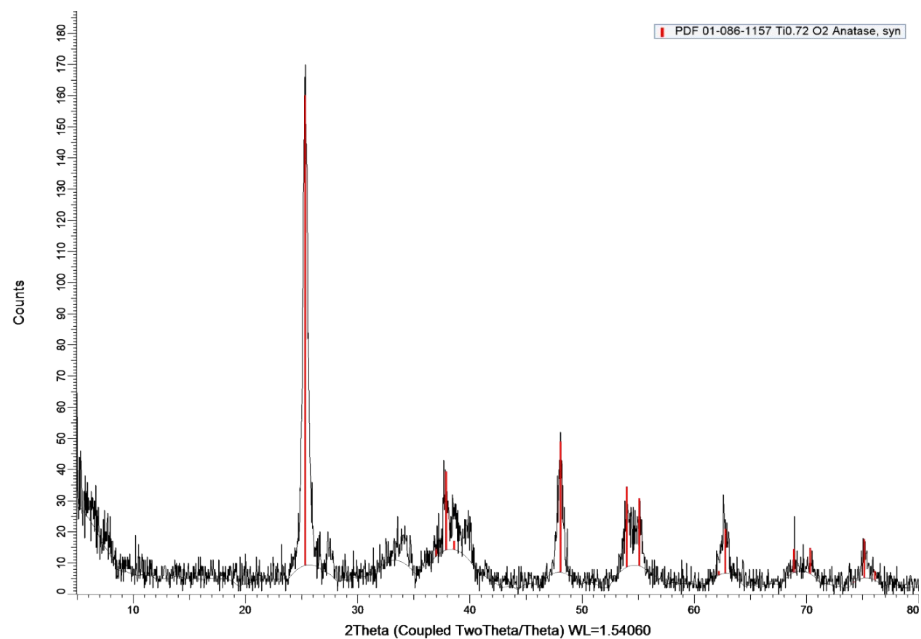

Figure 8. HHTS XRD indexing to Anatase  $\text{TiO}_2$

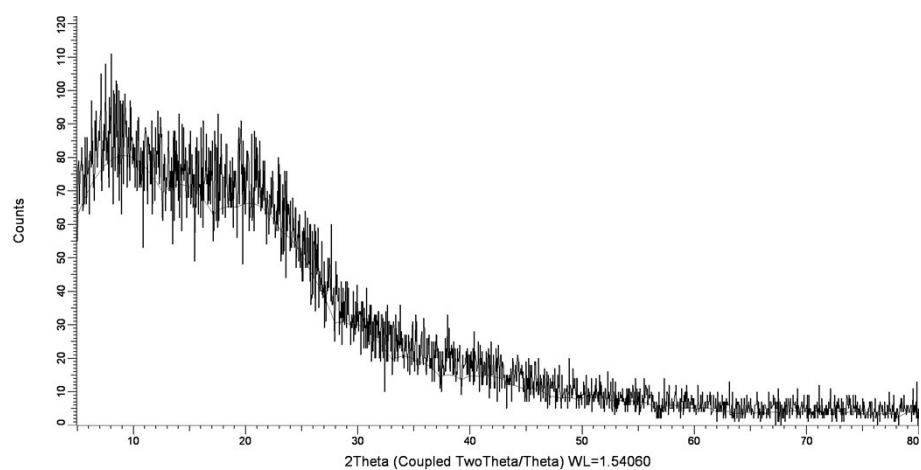

Figure 9 Carbonaceous Spheres XRD pattern

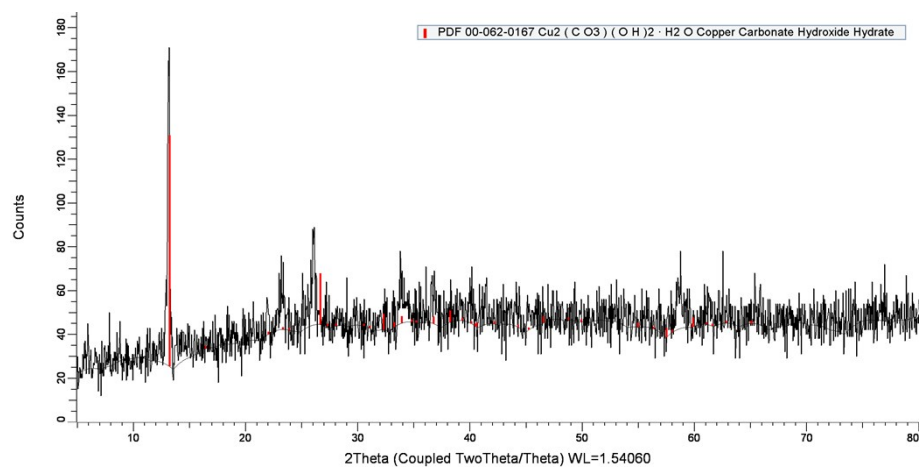

Figure 10 Cu-C spheres XRD indexing to Copper Carbonate Hydroxide Hydrate

## Kubelka-Munk Function

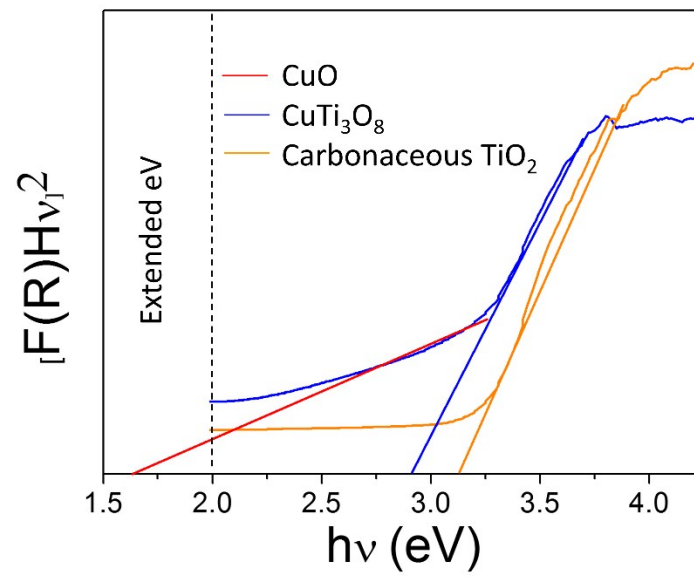

Figure 11 Kubelka-Munk function reflecting HHTS Carbonaceous  $\text{TiO}_2$ , shift in the eV of the HHHS due to possible hypothetical  $\text{CuTi}_3\text{O}_8$  and the presence of CuO which eV ranges from 1.2 to 2.
